# Supplementary material for: Partial Derivative Estimation for Underlying Functional-Valued Process in a Unified Framework
Source: Hindawi journal article supplement (doi:10.1155/2020/6086983), 2020-01-13
Supplement: f1 [file 6086983.f1.pdf]

Supplementary Materials to

# Partial Derivatives Estimation for Underlying Functional-Valued Process in a Unified Framework

By Yunbei Ma, Fanyin Zhou and Xuan Luo

Some technical Lemmas needed for our main results are stated and proved below.

**Lemma 1.** *Let  $Z_{iml} = X_i(S_{iml}, T_{im})$  or  $\varepsilon_{iml}$  for  $i = 1, \dots, n$ ,  $m = 1, \dots, M_i$ ,  $l = 1, \dots, L_{im}$ . Suppose for some  $\lambda \in (2, \infty)$  that*

$$E \left( \sup_{s \in S, t \in T} |X_i(S_{iml}, T_{im})|^\lambda \right) < \infty \text{ and } E|\varepsilon|^\lambda < \infty, \quad (1)$$

Define

$$D_n((s_1, s_2), (t_1, t_2)) = \frac{1}{n} \sum_{i=1}^n \frac{1}{M_i} \sum_{m=1}^{M_i} \frac{1}{L_{im}} \sum_{l=1}^{L_{im}} Z_{iml} I(S_{iml} \in [s_1 \wedge s_2, s_1 \vee s_2]) I(T_{im} \in [t_1 \wedge t_2, t_1 \vee t_2]),$$

and  $D((s_1, s_2), (t_1, t_2)) = E[D_n((s, s+u), (t, t+v))]$ . Let  $c_n, c'_n$  be any positive sequences tending to 0 and  $\beta_n = c_n c'_n (\gamma_{n21} + \gamma_{n20} c_n + \gamma_{n11} c'_n + c_n c'_n)$ , then if  $\beta_n^{-1} (\log n/n)^{1-2/\lambda} = o(1)$ , we have

$$\sup_{\substack{s \in [0, a] \\ t \in [0, b]}} \sup_{\substack{|u| \leq c_n \\ |v| \leq c'_n}} |D_n((s, s+u), (t, t+v)) - D((s, s+u), (t, t+v))| = O_{a.s.}(n^{-1/2}(\beta_n \log n)^{1/2}).$$

**Proof.** We can treat the positive and negative parts of  $Z_{iml}$  separately, and will assume below that  $Z_{iml}$  is nonnegative. Define equally-spaced grids  $\mathcal{B}_n = \{u_k\}$  and  $\mathcal{B}'_n = \{v_{k'}\}$ , where  $u_k = k c_n$ , for  $k = 0, \dots, [\frac{a}{c_n}]$ , and  $u_{[\frac{a}{c_n}]} = a$ , and  $v_{k'} = k' c'_n$ , for  $k' = 0, \dots, [\frac{b}{c'_n}]$ , and  $v_{[\frac{b}{c'_n}]} = b$ . For any  $s \in [0, a]$ ,  $t \in [0, b]$  and  $|u| \leq c_n$ ,  $|v| \leq c'_n$ , let  $u_k$  be a grid point that is within  $c_n$  of both  $s$  and  $s+u$ , which exists; let  $v_{k'}$  be a grid point that is within  $c'_n$  of both  $t$  and  $t+v$ , which exists. Note that

$$\begin{aligned} & |D_n((s, s+u), (t, t+v)) - D((s, s+u), (t, t+v))| \\ \leq & |D_n((u_k, s+u), (v_{k'}, t+v)) - D((u_k, s+u), (v_{k'}, t+v))| \\ & + |D_n((u_k, s), (v_{k'}, t)) - D((u_k, s), (v_{k'}, t))| + |D_n((u_k, s+u), (v_{k'}, t)) - D((u_k, s+u), (v_{k'}, t))| \\ & + |D_n((u_k, s), (v_{k'}, t+v)) - D((u_k, s), (v_{k'}, t+v))|, \end{aligned}$$

then we have

$$\begin{aligned} & \sup_{s \in [0, a], t \in [0, b]} |D_n((s, s+u), (t, t+v)) - D((s, s+u), (t, t+v))| \\ & \leq 4 \sup_{s \in \mathcal{B}_n, t \in \mathcal{B}'_n} V_n(s, t, c_n, c'_n), \end{aligned} \quad (2)$$

where  $V_n(s, t, c_n, c'_n) = \sup_{|u| \leq c_n, |v| \leq c'_n} |D_n((s, s+u), (t, t+v)) - D((s, s+u), (t, t+v))|$ .

Let  $\alpha_n = n^{-1/2}(\beta_n \log n)^{1/2}$  and  $\rho_n = \beta_n/\alpha_n$ , and define  $D_n^*((s, s+u), (t, t+v))$ ,  $D^*((s, s+u), (t, t+v))$  and  $V_n^*(s, t, c_n, c'_n)$  in the same way as  $D_n((s, s+u), (t, t+v))$ ,  $D((s, s+u), (t, t+v))$  and  $V_n(s, t, c_n, c'_n)$ , except with  $Z_{iml}I(Z_{iml} \leq \rho_n)$  replacing  $Z_{iml}$ . Then

$$\sup_{s \in \mathcal{B}_n, t \in \mathcal{B}'_n} V_n(s, t, c_n, c'_n) \leq \sup_{s \in \mathcal{B}_n, t \in \mathcal{B}'_n} V_n^*(s, t, c_n, c'_n) + A_{n1} + A_{n2}, \quad (3)$$

where

$$\begin{aligned} A_{n1} &= \sup_{\substack{s \in [0, a] \\ t \in [0, b]}} \sup_{\substack{|u| \leq c_n \\ |v| \leq c'_n}} |D_n((s, s+u), (t, t+v)) - D_n^*((s, s+u), (t, t+v))|, \\ A_{n2} &= \sup_{\substack{s \in [0, a] \\ t \in [0, b]}} \sup_{\substack{|u| \leq c_n \\ |v| \leq c'_n}} |D((s, s+u), (t, t+v)) - D^*((s, s+u), (t, t+v))|. \end{aligned}$$

We first consider  $A_{n1}$  and  $A_{n2}$ . For all  $s, t$  and  $u, v$ , by Markov's inequality,

$$\begin{aligned} & (D_n((s, s+u), (t, t+v)) - D_n^*((s, s+u), (t, t+v))) \\ & \leq \frac{1}{n} \sum_{i=1}^n \left\{ \frac{1}{M_i} \sum_{m=1}^{M_i} \left[ \frac{1}{L_{im}} \sum_{l=1}^{L_{im}} Z_{iml} I(Z_{iml} > \rho_n) \right] \right\} \\ & \leq \frac{\rho_n^{1-\lambda}}{n} \sum_{i=1}^n \left\{ \frac{1}{M_i} \sum_{m=1}^{M_i} \left[ \frac{1}{L_{im}} \sum_{l=1}^{L_{im}} Z_{iml}^\lambda I(Z_{iml} > \rho_n) \right] \right\}. \end{aligned}$$

Consider the case  $Z_{iml} = X_i(S_{iml}, T_{im})$ , the other case being simpler. It follows that

$$\frac{1}{M_i} \sum_{m=1}^{M_i} \left[ \frac{1}{L_{im}} \sum_{l=1}^{L_{im}} Z_{iml}^\lambda I(Z_{iml} > \rho_n) \right] \leq \tilde{Z}_i, \quad \text{where } \tilde{Z}_i = \sup_{\substack{s \in [0, a] \\ t \in [0, b]}} |X_i(S_{iml}, T_{im})|^\lambda,$$

then we have

$$\begin{aligned} & \alpha_n^{-1} (D_n((s, s+u), (t, t+v)) - D_n^*((s, s+u), (t, t+v))) \\ & \leq \alpha_n^{-1} \rho_n^{1-\lambda} \frac{1}{n} \sum_{i=1}^n \tilde{Z}_i. \end{aligned}$$

By the SLLN,  $n^{-1} \sum_{i=1}^n \tilde{Z}_i \xrightarrow{a.s.} E(\sup_{\substack{s \in [0, a] \\ t \in [0, b]}} |X_i(S_{iml}, T_{im})|^\lambda) < \infty$ . Since  $\alpha_n^{-1} \rho_n^{1-\lambda} = o(1)$ , it follows that

$$\alpha_n^{-1} A_{n1} \xrightarrow{a.s.} 0, \quad \text{and} \quad \alpha_n^{-1} A_{n2} = 0,$$

which yields to that

$$A_{n1} + A_{n2} = o_{a.s.}(\alpha_n). \quad (4)$$

We next focus on  $\sup_{s \in \mathcal{B}_n, t \in \mathcal{B}'_n} V_n^*(s, t, c_n, c'_n)$ . For fixed  $s \in \mathcal{B}_n$  and  $t \in \mathcal{B}'_n$ , we perform a further partition. Define  $\omega_n = [\rho^{1/2} c_n / \alpha_n^{1/2} + 1]$  and  $\omega'_n = [\rho^{1/2} c'_n / \alpha_n^{1/2} + 1]$ , and  $u_r = r c_n / \omega_n$  and  $v_{r'} = r' c'_n / \omega'_n$ , for  $r = -\omega_n, -\omega_n + 1, \dots, \omega_n$ , and  $r' = -\omega'_n, -\omega'_n + 1, \dots, \omega'_n$ . Note that  $D_n^*((s, s + u), (t, t + v))$  is monotone in both  $|u|$  and  $|v|$  since  $Z_{iml} \geq 0$ . Suppose that  $0 \leq u_r \leq u \leq u_{r+1}$ , and  $0 \leq v_{r'} \leq v \leq v_{r'+1}$ , then

$$D_n^*((s, s + u_r), (t, t + v_{r'})) \leq D_n^*((s, s + u), (t, t + v)) \leq D_n^*((s, s + u_{r+1}), (t, t + v_{r'+1})),$$

and

$$D^*((s, s + u_r), (t, t + v_{r'})) \leq D^*((s, s + u), (t, t + v)) \leq D^*((s, s + u_{r+1}), (t, t + v_{r'+1})).$$

Thus we have

$$\begin{aligned} & D_n^*((s, s + u_r), (t, t + v_{r'})) - D^*((s, s + u_r), (t, t + v_{r'})) \\ & \quad + D^*((s, s + u_r), (t, t + v_{r'})) - D^*((s, s + u_{r+1}), (t, t + v_{r'+1})) \\ & \leq D_n^*((s, s + u), (t, t + v)) - D^*((s, s + u), (t, t + v)) \\ & \leq D_n^*((s, s + u_{r+1}), (t, t + v_{r'+1})) - D^*((s, s + u_{r+1}), (t, t + v_{r'+1})) \\ & \quad + D^*((s, s + u_{r+1}), (t, t + v_{r'+1})) - D^*((s, s + u_r), (t, t + v_{r'})), \end{aligned}$$

from which we obtain that

$$\begin{aligned} & |D_n^*((s, s + u), (t, t + v)) - D^*((s, s + u), (t, t + v))| \\ & \leq \max(\kappa_{nrr'}(s, t), \kappa_{n(r+1)(r'+1)}(s, t)) + D^*((s + u_r, s + u_{r+1}), (t + v_{r'}, t + v_{r'+1})), \end{aligned}$$

where  $\kappa_{nrr'}(s, t) = |D_n^*((s, s + u_r), (t, t + v_{r'})) - D^*((s, s + u_r), (t, t + v_{r'}))|$ . The same hold if  $0 \leq u_r \leq u \leq u_{r+1}$ ,  $v_{r'} \leq v \leq v_{r'+1} \leq 0$  or  $u_r \leq u \leq u_{r+1} \leq 0$ ,  $0 \leq v_{r'} \leq v \leq v_{r'+1}$  or

$u_r \leq u \leq u_{r+1} \leq 0$ ,  $v_{r'} \leq v \leq v_{r'+1} \leq 0$ . Thus,

$$|V_n^*(s, t, c_n, c'_n)| \leq \max_{\substack{-\omega_n \leq r \leq \omega_n \\ -\omega'_n \leq r' \leq \omega'_n}} \kappa_{nr r'}(s, t) + \max_{\substack{-\omega_n \leq r \leq \omega_n \\ -\omega'_n \leq r' \leq \omega'_n}} D^*((s + u_r, s + u_{r+1}), (t + v_{r'}, t + v_{r'+1})).$$

For all  $r, r'$

$$\begin{aligned} & D^*((s + u_r, s + u_{r+1}), (t + v_{r'}, t + v_{r'+1})) \\ & \leq \rho_n \Pr\{s + u_r \leq S \leq s + u_{r+1}, t + v_{r'} \leq T \leq t + v_{r'+1}\} \\ & \leq \rho_n \Pr\{s + u_r \leq S \leq s + u_{r+1}\} \Pr\{t + v_{r'} \leq T \leq t + v_{r'+1}\} \\ & \leq M_S M_T \rho_n \left(\frac{c_n}{\omega_n}\right) \left(\frac{c'_n}{\omega'_n}\right) \\ & \leq M_S M_T \rho_n \alpha_n. \end{aligned}$$

Hence, for any  $B > 0$ ,

$$\Pr\{V_n^*(s, t, c_n, c'_n) \geq B\alpha_n\} \leq \Pr\left\{\max_{\substack{-\omega_n \leq r \leq \omega_n \\ -\omega'_n \leq r' \leq \omega'_n}} \kappa_{nr r'}(s, t) \geq (B - M_S M_T)\alpha_n\right\}. \quad (5)$$

Suppose  $u_r \geq 0$ , and  $v_{r'} \geq 0$  (other situations hold in the same way), let

$$W_{im}(s, t) = \frac{1}{L_{im}} \sum_{l=1}^{L_{im}} Z_{iml} I(Z_{iml} \leq \rho_n) I(S_{iml} \in (s, s + u_r]),$$

and

$$\tilde{W}_i(s, t) = \frac{1}{M_i} \sum_{m=1}^{M_i} W_{im} I(T_{im} \in (t, t + v_{r'}]),$$

so that  $\kappa_{nr r'}(s, t) = \frac{1}{n} |\sum_{i=1}^n \{\tilde{W}_i(s, t) - E(\tilde{W}_i(s, t))\}|$ . Obviously,  $|\tilde{W}_i(s, t) - E(\tilde{W}_i(s, t))| \leq \rho_n$ , we next focus on the variance of  $\tilde{W}_i(s, t)$ . Note that

$$\begin{aligned} E\tilde{W}_i^2(s, t) &= \frac{1}{M_i^2} \left\{ \sum_{m=1}^{M_i} E[W_{im}^2 I(T_{im} \in (t, t + v_{r'}])] \right. \\ &\quad \left. + \sum_{m \neq m'}^{M_i} E[W_{im} W_{im'} I(T_{im} \in (t, t + v_{r'}]) I(T_{im'} \in (t, t + v_{r'}])] \right\}, \quad (6) \end{aligned}$$

we consider  $E[W_{im}^2 I(T_{im} \in (t, t + v_{r'}])]$  and  $E[W_{im} W_{im'} I(T_{im} \in (t, t + v_{r'}]) I(T_{im'} \in (t, t + v_{r'}])]$  separately. Since,

$$\begin{aligned} & E[Z_{iml}^2 I(Z_{iml} \leq \rho_n) I(S_{iml} \in (s, s + u_r]) | T_{im}] \\ & \leq E\{E[Z_{iml}^2 | S_{iml}, T_{im}] I(S_{iml} \in (s, s + u_r]) | T_{im}\} \\ & \leq C \Pr\{s < S_{iml} \leq s + u_r | T_{im}\}, \end{aligned}$$

and for  $l \neq l'$ ,

$$\begin{aligned}
& \mathbb{E} [Z_{iml} Z_{iml'} I(Z_{iml} \leq \rho_n) I(Z_{iml'} \leq \rho_n) I(S_{iml} \in (s, s + u_r)) I(S_{iml'} \in (s, s + u_r)) | T_{im}] \\
& \leq \mathbb{E} \{ \mathbb{E} [Z_{iml} Z_{iml'} | S_{iml}, S_{iml'}, T_{im}] I(S_{iml} \in (s, s + u_r)) I(S_{iml'} \in (s, s + u_r)) | T_{im} \} \\
& \leq C \Pr\{s < S_{iml} \leq s + u_r, s < S_{iml'} \leq s + u_r | T_{im}\},
\end{aligned}$$

we have

$$\begin{aligned}
& \mathbb{E} [W_{im}^2 | T_{im}] \\
& = \frac{1}{L_{im}^2} \left\{ \sum_{l=1}^{L_{im}} \mathbb{E} [Z_{iml}^2 I(Z_{iml} \leq \rho_n) I(S_{iml} \in (s, s + u_r)) | T_{im}] \right. \\
& \quad \left. + \sum_{l \neq l'}^{L_{im}} \mathbb{E} [Z_{iml} Z_{iml'} I(Z_{iml} \leq \rho_n) I(Z_{iml'} \leq \rho_n) I(S_{iml} \in (s, s + u_r)) I(S_{iml'} \in (s, s + u_r)) | T_{im}] \right\} \\
& \leq \frac{C}{L_{im}^2} \left( \sum_{l=1}^{L_{im}} \Pr\{s < S_{iml} \leq s + u_r | T_{im}\} \right. \\
& \quad \left. + \sum_{l \neq l'}^{L_{im}} \Pr\{s < S_{iml} \leq s + u_r, s < S_{iml'} \leq s + u_r | T_{im}\} \right). \tag{7}
\end{aligned}$$

It follows from Condition (6) that

$$\begin{aligned}
& \mathbb{E} [W_{im}^2 I(T_{im} \in (t, t + v_{r'}))] \\
& = \mathbb{E} \left\{ \mathbb{E} [W_{im}^2 | T_{im}] I(T_{im} \in (t, t + v_{r'})) \right\} \\
& \leq CL_{im}^{-2} \left( \sum_{l=1}^{L_{im}} \Pr\{s < S_{iml} \leq s + u_r, t < T_{im} \leq t + v_{r'}\} \right. \\
& \quad \left. + \sum_{l \neq l'}^{L_{im}} \Pr\{s < S_{iml} \leq s + u_r, s < S_{iml'} \leq s + u_r, t < T_{im} \leq t + v_{r'}\} \right) \\
& \leq CL_{im}^{-2} \Pr\{t < T_{im} \leq t + v_{r'}\} \left( \sum_{l=1}^{L_{im}} \Pr\{s < S_{iml} \leq s + u_r\} \right. \\
& \quad \left. + \sum_{l \neq l'}^{L_{im}} \Pr\{s < S_{iml} \leq s + u_r\} \Pr\{s < S_{iml'} \leq s + u_r\} \right) \\
& \leq CM_T v_{r'} L_{im}^{-2} (L_{im} M_S u_r + L_{im}^* M_S^2 u_r^2) \\
& = CM_T M_S v_{r'} u_r L_{im}^{-1} [1 + (L_{im} - 1) M_S u_r]. \tag{8}
\end{aligned}$$

On the other hand, by the Cauchy-Schwarz inequality,

$$\begin{aligned}
& \mathbb{E} [W_{im} W_{im'} I(T_{im} \in (t, t + v_{r'})) I(T_{im'} \in (t, t + v_{r'}))] \\
&= \mathbb{E} \{ \mathbb{E} [W_{im} W_{im'} | T_{im}, T_{im'}] I(T_{im} \in (t, t + v_{r'})) I(T_{im'} \in (t, t + v_{r'})) \} \\
&\leq \frac{1}{2} \left\{ \mathbb{E} [W_{im}^2 I(T_{im} \in (t, t + v_{r'})) I(T_{im'} \in (t, t + v_{r'}))] \right. \\
&\quad \left. + \mathbb{E} [W_{im'}^2 I(T_{im} \in (t, t + v_{r'})) I(T_{im'} \in (t, t + v_{r'}))] \right\} \\
&\leq \frac{1}{2} C M_T M_S v_{r'}^2 u_r \left\{ L_{im}^{-1} [1 + (L_{im} - 1) M_S u_r] + L_{im'}^{-1} [1 + (L_{im'} - 1) M_S u_r] \right\}. \quad (9)
\end{aligned}$$

By combining (8), (9) and (6), we have

$$\mathbb{E} \tilde{W}_i^2(s, t) \leq C M_S M_T v_{r'} u_r \left[ \frac{1}{M_i^2} \sum_{m=1}^{M_i} \frac{1}{L_{im}} + \frac{M_S u_r}{M_i} + \frac{v_{r'}}{M_i} \sum_{m=1}^{M_i} \frac{1}{L_{im}} + v_{r'} M_S u_r \right],$$

from which we conclude that for some constant  $C > 0$ ,

$$\begin{aligned}
\sum_{i=1}^n \text{Var}(\tilde{W}_i(s, t)) &\leq \sum_{i=1}^n \mathbb{E} \tilde{W}_i^2(s, t) \\
&\leq C c_n c'_n \sum_{i=1}^n \left[ \frac{1}{M_i^2} \sum_{m=1}^{M_i} \frac{1}{L_{im}} + \frac{c_n}{M_i} + \frac{c'_n}{M_i} \sum_{m=1}^{M_i} \frac{1}{L_{im}} + c'_n c_n \right] \\
&= n C \beta_n. \quad (10)
\end{aligned}$$

Then, by Bernstein's inequality,

$$\begin{aligned}
& \Pr\{\kappa_{nrr'}(s, t) \geq (B - M_S M_T) \alpha_n\} \\
&\leq \exp\left\{-\frac{(B - M_S M_T)^2 \alpha_n^2 n^2}{2n C \beta_n + \frac{2}{3}(B - M_S M_T) n \alpha_n \rho_n}\right\} \\
&\leq n^{\left\{-\frac{(B - M_S M_T)^2}{2C + \frac{2}{3}(B - M_S M_T)}\right\}}.
\end{aligned}$$

Thus, by (5) and Boole's inequality,

$$\begin{aligned}
& \Pr\left\{\sup_{\substack{s \in \mathcal{B}_n \\ t \in \mathcal{B}'_n}} V_n^*(s, t, c_n, c'_n) \geq B \alpha_n\right\} \\
&\leq \left(\left[\frac{1}{c_n}\right] + 1\right) \left(\left[\frac{1}{c'_n}\right] + 1\right) \left(2 \left[\frac{\rho_n^{1/2} c_n}{\alpha_n^{1/2}} + 1\right] + 1\right) \left(2 \left[\frac{\rho_n^{1/2} c'_n}{\alpha_n^{1/2}} + 1\right] + 1\right) n^{-C} \\
&\leq C^* \rho_n^{-1} \alpha_n n^{\left\{-\frac{(B - M_S M_T)^2}{2C + \frac{2}{3}(B - M_S M_T)}\right\}} \quad (11)
\end{aligned}$$

for some finite constant  $C^* > 0$ . Note that  $\rho_n^{-1}\alpha_n = n/\log n$ , and hence  $C^*\rho_n^{-1}\alpha_n n^{\{-\frac{(B-M_S M_T)^2}{2C+\frac{2}{3}(B-M_S M_T)}\}}$  is summable in  $n$  if we select  $B$  large enough. Thus by the Borel-Cantelli lemma,

$$\sup_{\substack{s \in \mathcal{B}_n \\ t \in \mathcal{B}'_n}} V_n^*(s, t, c_n, c'_n) = O_{a.s.}(\alpha_n),$$

which together with (2), (3) and (4) proves Lemma 1.  $\square$

**Lemma 2.** *Let  $Z_{iml}$  be as in Lemma 1 and assume that (1) holds. For bandwidths  $h_1, h_2$ , and nonnegative integers  $p, q$ , let*

$$D_{npq}(s, t) = \frac{1}{n} \sum_{i=1}^n \frac{1}{M_i} \sum_{m=1}^{M_i} \frac{1}{L_{im}} \sum_{l=1}^{L_{im}} Z_{iml} K_{h_1}(S_{iml} - s) K_{h_2}(T_{im} - t) \left(\frac{S_{iml} - s}{h_1}\right)^p \left(\frac{T_{im} - t}{h_2}\right)^q.$$

Let  $\beta_n = h_1 h_2 (\gamma_{n21} + 2\gamma_{n20} h_1 + 2\gamma_{n11} h_2 + 4h_1 h_2)$ , assume that  $h_1 \rightarrow 0$ ,  $h_2 \rightarrow 0$ , and  $\beta_n^{-1}(\log n/n)^{1-2/\lambda} = o(1)$ , then we have

$$\sqrt{nh_1^2 h_2^2 / (\beta_n \log n)} \sup_{\substack{s \in [0, a] \\ t \in [0, b]}} |D_{npq}(s, t) - \mathbb{E}[D_{npq}(s, t)]| = O_{a.s.}(1). \quad (12)$$

**Proof.** Note that  $K_{(p)}(s) = s^p K(s)$  is a bounded variation for nonnegative integer  $p$  and any bandwidth  $h$ , then we can write  $K_{(p)} = K_{(p)}^{(1)} - K_{(p)}^{(2)}$ , where both  $K_{(p)}^{(1)}$  and  $K_{(p)}^{(2)}$  are increasing functions. Without loss of generality, we assume that  $K_{(p)}^{(1)}(-1) = K_{(p)}^{(2)}(-1) = 0$ . Let  $K_{h,p}(s) = (s/h)^p K_h(s)$ , we further write

$$\begin{aligned} D_{npq}(s, t) &= \frac{1}{n} \sum_{i=1}^n \frac{1}{M_i} \sum_{m=1}^{M_i} \frac{1}{L_{im}} \sum_{l=1}^{L_{im}} Z_{iml} K_{h_1,p}(S_{iml} - s) K_{h_2,q}(T_{im} - t) \\ &= \frac{1}{n} \sum_{i=1}^n \frac{1}{M_i} \sum_{m=1}^{M_i} \frac{1}{L_{im}} \sum_{l=1}^{L_{im}} Z_{iml} I(-h_1 \leq S_{iml} - s \leq h_1) I(-h_2 \leq T_{im} - t \leq h_2) \\ &\quad \int_{-h_1}^{S_{iml}-s} dK_{h_1,p}(u) \int_{-h_2}^{T_{im}-t} dK_{h_2,q}(v) \\ &= \int_{-h_2}^{h_2} \int_{-h_1}^{h_1} \frac{1}{n} \left\{ \sum_{i=1}^n \frac{1}{M_i} \sum_{m=1}^{M_i} \frac{1}{L_{im}} \sum_{l=1}^{L_{im}} Z_{iml} I(u \leq S_{iml} - s \leq h_1) I(v \leq T_{im} - t \leq h_2) \right\} \\ &\quad dK_{h_1,p}(u) dK_{h_2,q}(v) \\ &= \int_{-h_2}^{h_2} \int_{-h_1}^{h_1} D_n((s+u, s+h_1), (t+v, t+h_2)) dK_{h_1,p}(u) dK_{h_2,q}(v), \end{aligned}$$

where  $D_n((s+u, s+h_1), (t+v, t+h_2))$  is as defined in Lemma 1. By letting  $c_n = 2h_1$  and  $c'_n = 2h_2$ , we apply Lemma 1 to  $D_n$ , which clearly satisfies assumption of Lemma 1, then we

have

$$\begin{aligned}
& \sup_{s \in [0, a], t \in [0, b]} |D_{npq}(s, t) - \mathbb{E}[D_{npq}(s, t)]| \\
& \leq \sup_{s \in [0, a], t \in [0, b]} V_n(s, t, 2h_1, 2h_2) \int_{-h_2}^{h_2} |dK_{h_2, q}(v)| \int_{-h_1}^{h_1} |dK_{h_1, p}(u)| \\
& \leq h_1^{-1} h_2^{-1} [K_{(p)}^{(1)}(1) + K_{(p)}^{(2)}(1)] [K_{(q)}^{(1)}(1) + K_{(q)}^{(2)}(1)] \sup_{s \in [0, a], t \in [0, b]} V_n(s, t, 2h_1, 2h_2)
\end{aligned}$$

By Lemma 1, we have

$$\sup_{s \in [0, a], t \in [0, b]} V_n(s, t, 2h_1, 2h_2) = O_{a.s.}(n^{-1/2}(\beta_n \log n)^{1/2}), \quad (13)$$

which yields to (12). Lemma 2 holds.  $\square$

**Lemma 3.** Let  $Z_{iml'l'} = X_i(S_{iml}, T_{im})X_i(S_{iml'}, T_{im})$ ,  $X_i(S_{iml}, T_{im})\varepsilon_{iml'}$  or  $\varepsilon_{iml}\varepsilon_{iml'}$  for  $i = 1, \dots, n$ ,  $m = 1, \dots, M_i$ ,  $l, l' = 1, \dots, L_{im}$ . Suppose for some  $\lambda \in (2, \infty)$  that

$$E \left( \sup_{s \in \mathcal{S}, t \in \mathcal{T}} |X_i(S_{iml}, T_{im})|^{2\lambda} \right) < \infty \text{ and } E|\varepsilon|^{2\lambda} < \infty, \quad (14)$$

Define

$$\begin{aligned}
& Q_n((s_1, s_2), (u_1, u_2), (t_1, t_2)) \\
& = \frac{1}{n} \sum_{i=1}^n \frac{1}{M_i} \sum_{m=1}^{M_i} \frac{1}{L_{im}^*} \sum_{l \neq l'}^{L_{im}} Z_{iml'l'} \\
& \quad I(S_{iml} \in [s_1 \wedge s_2, s_1 \vee s_2]) I(S_{iml'} \in [u_1 \wedge u_2, u_1 \vee u_2]) I(T_{im} \in [t_1 \wedge t_2, t_1 \vee t_2]),
\end{aligned}$$

and  $Q((s_1, s_2), (u_1, u_2), (t_1, t_2)) = \mathbb{E}[Q_n((s_1, s_2), (u_1, u_2), (t_1, t_2))]$ . Let  $c_n$ ,  $c'_n$  and  $c''_n$  be any positive sequences tending to 0 and  $\beta_n = c_n c'_n c''_n (\gamma_{n22} + \gamma_{n20} c_n c'_n + \gamma_{n12} c''_n + c_n c'_n c''_n)$ , then if  $\beta_n^{-1}(\log n/n)^{1-2/\lambda} = o(1)$ , we have

$$\begin{aligned}
& \sup_{\substack{s, u \in [0, a] \\ t \in [0, b]}} \sup_{\substack{|v_1| \leq c_n \\ |v_2| \leq c'_n \\ |v_3| \leq c''_n}} |Q_n((s, s+v_1), (u, u+v_2), (t, t+v_3)) - Q((s, s+v_1), (u, u+v_2), (t, t+v_3))| \\
& = O_{a.s.}(n^{-1/2}(\beta_n \log n)^{1/2}).
\end{aligned}$$

**Proof.** The proof is similar to that of Lemma 1, and so we only outline the main differences. Let  $\alpha_n$  and  $\rho_n$  be as in Lemma 1. Let  $\mathcal{B}_n = \{v_{k_1}\}$  be equally spaced grid on  $[0, a]$  with  $v_{k_1} = k_1 c_n$ , for  $k_1 = 0, \dots, [\frac{a}{c_n}]$ , and  $v_{[\frac{a}{c_n}]} = a$ ; let  $\mathcal{B}'_n = \{v'_{k_2}\}$  be equally-spaced grid on



$[0, a]$  with  $v'_{k_2} = k_2 c'_n$ , for  $k_2 = 0, \dots, [\frac{a}{c'_n}]$ , and  $v'_{[\frac{a}{c'_n}]} = a$ ; let  $\mathcal{B}_n'' = \{v''_{k_3}\}$  be equally-spaced grid on  $[0, b]$  with  $v'_{k_3} = k_3 c''_n$ , for  $k_3 = 0, \dots, [\frac{b}{c''_n}]$ , and  $v''_{[\frac{b}{c''_n}]} = b$ . Define

$$\begin{aligned} & V_n(s, u, t, c_n, c'_n, c''_n) \\ &= \sup_{\substack{|v_1| \leq c_n \\ |v_2| \leq c'_n \\ |v_3| \leq c''_n}} |Q_n((s, s + v_1), (u, u + v_2), (t, t + v_3)) - Q((s, s + v_1), (u, u + v_2), (t, t + v_3))|, \end{aligned}$$

then we have

$$\sup_{\substack{s, u \in [0, a] \\ t \in [0, b]}} V_n(s, u, t, c_n, c'_n, c''_n) \leq 8 \sup_{\substack{s \in \mathcal{B}_n \\ u \in \mathcal{B}'_n \\ t \in \mathcal{B}''_n}} V_n(s, u, t, c_n, c'_n, c''_n) \quad (15)$$

Now define  $Q_n^*$ ,  $Q^*$  and  $V_n^*$  in the same way as  $Q_n$ ,  $Q$  and  $V_n$  except with  $Z_{imll'} I(Z_{imll'} \leq \rho_n)$  replacing  $Z_{imll'}$ . Then, we have

$$\sup_{\substack{s \in \mathcal{B}_n \\ u \in \mathcal{B}'_n \\ t \in \mathcal{B}''_n}} V_n(s, u, t, c_n, c'_n, c''_n) \leq \sup_{\substack{s \in \mathcal{B}_n \\ u \in \mathcal{B}'_n \\ t \in \mathcal{B}''_n}} V_n^*(s, u, t, c_n, c'_n, c''_n) + A_{n1} + A_{n2}, \quad (16)$$

where

$$\begin{aligned} A_{n1} &= \sup_{\substack{s \in \mathcal{B}_n \\ u \in \mathcal{B}'_n \\ t \in \mathcal{B}''_n}} \sup_{\substack{|v_1| \leq c_n \\ |v_2| \leq c'_n \\ |v_3| \leq c''_n}} \left| Q_n((s, s + v_1), (u, u + v_2), (t, t + v_3)) \right. \\ &\quad \left. - Q_n^*((s, s + v_1), (u, u + v_2), (t, t + v_3)) \right|, \\ A_{n2} &= \sup_{\substack{s \in \mathcal{B}_n \\ u \in \mathcal{B}'_n \\ t \in \mathcal{B}''_n}} \sup_{\substack{|v_1| \leq c_n \\ |v_2| \leq c'_n \\ |v_3| \leq c''_n}} \left| Q((s, s + v_1), (u, u + v_2), (t, t + v_3)) \right. \\ &\quad \left. - Q^*((s, s + v_1), (u, u + v_2), (t, t + v_3)) \right|. \end{aligned}$$

By the similar argument in the proof of Lemma 1, we can show that

$$A_{n1} = o_{a.s.}(\alpha_n) \quad \text{and} \quad A_{n2} = o_{a.s.}(\alpha_n) \quad (17)$$

Now we consider  $V_n^*(s, u, t, c_n, c'_n, c''_n)$ . Similarly to the proof of Lemma 1, we create a further partition. Let  $\omega_n = [\rho^{1/3} c_n / \alpha_n^{1/3} + 1]$ ,  $\omega'_n = [\rho^{1/3} c'_n / \alpha_n^{1/3} + 1]$  and  $\omega''_n = [\rho^{1/3} c''_n / \alpha_n^{1/3} + 1]$ . Define  $v_{r_1} = r_1 c_n / \omega_n$ ,  $v'_{r_2} = r_2 c'_n / \omega'_n$ , and  $v''_{r_3} = r_3 c''_n / \omega''_n$ , for  $r_1 = -\omega_n, -\omega_n + 1, \dots, \omega_n$ ,  $r_2 =$

$-\omega'_n, -\omega'_n+1, \dots, \omega'_n$ , and  $r_3 = -\omega''_n, -\omega''_n+1, \dots, \omega''_n$ . Then for fixed  $(s, u, t) \in [0, a]^2 \times [0, b]$ ,

$$\begin{aligned} |V_n^*(s, u, t, c_n, c'_n, c''_n)| &\leq \max_{\substack{-\omega_n \leq r_1 \leq \omega_n \\ -\omega'_n \leq r_2 \leq \omega'_n \\ -\omega''_n \leq r_3 \leq \omega''_n}} \kappa_{nr_1 r_2 r_3}(s, u, t) \\ &+ \max_{\substack{-\omega_n \leq r_1 \leq \omega_n \\ -\omega'_n \leq r_2 \leq \omega'_n \\ -\omega''_n \leq r_3 \leq \omega''_n}} Q^*((s + v_{r_1}, s + v_{r_1+1}), (u + v'_{r_2}, u + v'_{r_2+1}), (t + v''_{r_3}, t + v''_{r_3+1})), \end{aligned}$$

where

$$\kappa_{nr_1 r_2 r_3}(s, u, t) = |Q_n^*((s, s+v_{r_1}), (u, u+v'_{r_1}), (t, t+v''_{r_3})) - Q^*((s, s+v_{r_1}), (u, u+v'_{r_1}), (t, t+v''_{r_3}))|.$$

For all  $r_1, r_2$  and  $r_3$ , it's easy to show that

$$\begin{aligned} &Q^*((s + v_{r_1}, s + v_{r_1+1}), (u + v'_{r_2}, u + v'_{r_2+1}), (t + v''_{r_3}, t + v''_{r_3+1})) \\ &\leq M_S^2 M_T \alpha_n. \end{aligned}$$

Thus, for any  $B > 0$ ,

$$\Pr\{V_n^*(s, u, t, c_n, c'_n, c''_n) \geq B\alpha_n\} \leq \Pr\left\{\max_{\substack{-\omega_n \leq r_1 \leq \omega_n \\ -\omega'_n \leq r_2 \leq \omega'_n \\ -\omega''_n \leq r_3 \leq \omega''_n}} \kappa_{nr_1 r_2 r_3}(s, u, t) \geq (B - M_S^2 M_T)\alpha_n\right\}. \quad (18)$$

Now let

$$W_{im}(s, u, t) = \frac{1}{L_{im}^*} \sum_{l \neq l'}^{L_{im}} Z_{iml} I(Z_{iml} \leq \rho_n) I(S_{iml} \in (s, s + v_{r_1}]) I(S_{iml} \in (u, u + v'_{r_2}]),$$

and

$$\tilde{W}_i(s, u, t) = \frac{1}{M_i} \sum_{m=1}^{M_i} W_{im} I(T_{im} \in (t, t + v''_{r_3}]),$$

the by the similar algebra in the proof of Lemma 1, we

$$\begin{aligned} \sum_{i=1}^n \text{Var}(\tilde{W}_i(s, u, t)) &\leq \sum_{i=1}^n E \tilde{W}_i^2(s, u, t) \\ &\leq C c_n c'_n c''_n \sum_{i=1}^n \left[ \frac{1}{M_i^2} \sum_{m=1}^{M_i} \frac{1}{L_{im}^2} + \frac{c_n c'_n}{M_i} + \frac{c''_n}{M_i} \sum_{m=1}^{M_i} \frac{1}{L_{im}^2} + c_n c'_n c''_n \right] \\ &= n C \beta_n. \end{aligned} \quad (19)$$

The rest of the proof completely mirrors that of Lemma 1 and is omitted.  $\square$

**Lemma 4.** Let  $Z_{iml'}$  be as in Lemma 3 and assume that (14) holds. For bandwidths  $h_3, h_4$  and  $h_5$ , and nonnegative integers  $p, q, r$ , let

$$Q_{npqr}(s, u, t) = \frac{1}{n} \sum_{i=1}^n \frac{1}{M_i} \sum_{m=1}^{M_i} \frac{1}{L_{im}^*} \sum_{l \neq l'}^{L_{im}} Z_{iml'} K_{h_3,p}(S_{iml} - s) K_{h_4,q}(S_{iml'} - u) K_{h_5,r}(T_{im} - t)$$

where  $K_{h,p}(\cdot) = (\cdot/h)^p K_h(\cdot)$ . Let  $\beta_n = h_3 h_4 h_5 (\gamma_{n22} + 4\gamma_{n20} h_3 h_4 + 2\gamma_{n12} h_5 + 8h_3 h_4 h_5)$ , assume that  $h_3 \rightarrow 0, h_4 \rightarrow 0, h_5 \rightarrow 0$ , and  $\beta_n^{-1}(\log n/n)^{1-2/\lambda} = o(1)$ , then we have

$$\sqrt{nh_3^2 h_4^2 h_5^2 / (\beta_n \log n)} \sup_{\substack{s, u \in [0, a] \\ t \in [0, b]}} |Q_{npqr}(s, u, t) - E[Q_{npqr}(s, u, t)]| = O_{a.s.}(1). \quad (20)$$

**Proof.** Obviously, we can write

$$Q_{npqr}(s, u, t) = \int_{-h_5}^{h_5} \int_{-h_4}^{h_4} \int_{-h_3}^{h_3} Q_n((s + v_1, s + h_3), (u + v_2, u + h_4)(t + v_3, t + h_5)) \\ dK_{h_3,p}(v_1) dK_{h_4,q}(v_2) dK_{h_5,r}(v_3),$$

where  $Q_n$  is as defined in Lemma 3. By letting  $c_n = 2h_3, c'_n = 2h_4, c''_n = 2h_5$ , and applying Lemma 3, we can obtain that

$$\begin{aligned} & \sup_{s, u \in [0, a], t \in [0, b]} |Q_{npqr}(s, u, t) - E[Q_{npqr}(s, u, t)]| \\ & \leq \sup_{s, u \in [0, a], t \in [0, b]} V_n(s, u, t, 2h_3, 2h_4, 2h_5) \int_{-h_5}^{h_5} |dK_{h_5,r}(v)| \int_{-h_4}^{h_4} |dK_{h_4,q}(v)| \int_{-h_3}^{h_3} |dK_{h_3,p}(v)| \\ & \leq h_3^{-1} h_4^{-1} h_5^{-1} [K_{(p)}^{(1)}(1) + K_{(p)}^{(2)}(1)] [K_{(q)}^{(1)}(1) + K_{(q)}^{(2)}(1)] [K_{(r)}^{(1)}(1) + K_{(r)}^{(2)}(1)] \\ & \quad \sup_{s, u \in [0, a], t \in [0, b]} V_n(s, u, t, 2h_3, 2h_4, 2h_5) \\ & = O_{a.s.}(\sqrt{\beta_n \log n / nh_3^2 h_4^2 h_5^2}). \end{aligned}$$

Thus (20) follows.  $\square$

**Lemma 5.** Let  $Z_{iml}$  be as in Lemma 1 and assume that (1) holds. For bandwidths  $h_1$ , and nonnegative integers  $p$ , let

$$\bar{D}_n = \frac{1}{n} \sum_{i=1}^n \frac{1}{M_i} \sum_{m=1}^{M_i} \frac{1}{L_{im}} \sum_{l=1}^{L_{im}} Z_{iml}, \\ \tilde{D}_{np}(s) = \frac{1}{n} \sum_{i=1}^n \frac{1}{M_i} \sum_{m=1}^{M_i} \frac{1}{L_{im}} \sum_{l=1}^{L_{im}} Z_{iml} K_{h_1}(S_{iml} - s) \left( \frac{S_{iml} - s}{h_1} \right)^p.$$

Then we have

$$\sqrt{n/(\log n)} |\bar{D}_n - E\bar{D}_n| = O_{a.s.}(1). \quad (21)$$

Let  $\beta_n = h_1(\gamma_{n21} + 2\gamma_{n20} + 2\gamma_{n11}h_2 + 4h_2)$ , assume that  $h_1 \rightarrow 0$ , and  $\beta_n^{-1}(\log n/n)^{1-2/\lambda} = o(1)$ , then we have

$$\sqrt{nh_1^2/(\beta_n \log n)} \sup_{s \in [0, a]} |\tilde{D}_{np}(s) - E[\tilde{D}_{np}(s)]| = O_{a.s.}(1). \quad (22)$$

**Proof.** (21) is obtained directly by the law of large numbers. Actually, if we take the second kernel function on  $D_{npq}(s, t)$  defined in Lemma 2 as the uniform density function on  $[0, b]$ , then  $\tilde{D}_{np}(s)$  is identical to  $D_{np0}(s, t)$  with  $h_2 = b$ . Since  $b$  is finite, then following the same proofs of Lemma 1 and Lemma 2, we can obtain (22).

**Lemma 6.** Let  $Z_{iml'}$  be as in Lemma 3 and assume that (14) holds. For bandwidths  $h_3$  and  $h_4$ , and nonnegative integers  $p$  and  $q$ , let

$$\begin{aligned} \tilde{Q}_{npq}(s, u) &= \frac{1}{n} \sum_{i=1}^n \frac{1}{M_i} \sum_{m=1}^{M_i} \frac{1}{L_{im}^*} \sum_{l \neq l'}^{L_{im}} Z_{iml'} K_{h_3, p}(S_{iml} - s) K_{h_4, q}(S_{iml'} - u), \\ \check{Q}_{np}(s) &= \frac{1}{n} \sum_{i=1}^n \frac{1}{M_i} \sum_{m=1}^{M_i} \frac{1}{L_{im}^*} \sum_{l \neq l'}^{L_{im}} Z_{iml'} K_{h_3, p}(S_{iml} - s), \\ \bar{Q}_n &= \frac{1}{n} \sum_{i=1}^n \frac{1}{M_i} \sum_{m=1}^{M_i} \frac{1}{L_{im}^*} \sum_{l \neq l'}^{L_{im}} Z_{iml'} K_{h_3}(S_{iml} - S_{iml'} + uh_3), \end{aligned}$$

where  $K_{h, p}(\cdot) = (\cdot/h)^p K_h(\cdot)$ .

Let  $\beta_n = h_3 h_4 (\gamma_{n22} + 4\gamma_{n20} h_3 h_4 + 2\gamma_{n12} + 8h_3 h_4)$ , assume that  $h_3 \rightarrow 0$ ,  $h_4 \rightarrow 0$ , and  $\beta_n^{-1}(\log n/n)^{1-2/\lambda} = o(1)$ , then we have

$$\sqrt{nh_3^2 h_4^2/(\beta_n \log n)} \sup_{s, u \in [0, a]} |\tilde{Q}_{npq}(s, u) - E[\tilde{Q}_{npq}(s, u)]| = O_{a.s.}(1). \quad (23)$$

Let  $\tilde{\beta}_n = h_3(\gamma_{n22} + 4\gamma_{n20} h_3 + 2\gamma_{n12} + 8h_3)$ , assume that  $h_3 \rightarrow 0$ , and  $\tilde{\beta}_n^{-1}(\log n/n)^{1-2/\lambda} = o(1)$ , then we have

$$\sqrt{nh_3^2/(\tilde{\beta}_n \log n)} \sup_{s, u \in [0, a]} |\check{Q}_{np}(s) - E[\check{Q}_{np}(s)]| = O_{a.s.}(1). \quad (24)$$

and

$$\sqrt{nh_3^2/(\tilde{\beta}_n \log n)} |\bar{Q}_n - E\bar{Q}_n| = O_{a.s.}(1). \quad (25)$$

The proofs of (23) and (24) are similar to proofs of Lemma 5 and is omitted here. A slightly modified version of Lemma 1 leads to the "one-dimensional" rate of  $\bar{Q}_n$  as (25).

The following Lemma 7 is needed for the proof of Theorem 3 and Theorem 4.

**Lemma 7.** *For any bounded measurable function  $\psi$  on  $[0, a]$ ,*

$$\sup_{u \in [0, a]} |(\Delta\psi)(u)| = O_{a.s.}(\delta_{n2}(h_4, 1, 1) + \gamma_{2d}(h_3, h_4, h_5) + \delta_{n1}(h_1, 1) + \gamma_{1d}(h_1, h_2)) \quad (26)$$

Proof.

$$\begin{aligned} (\Delta\psi)(u) &= \int_0^a (\hat{G}_{\mathcal{S}}(s, u) - G_{\mathcal{S}}(s, u))\psi(s)ds \\ &= \int_0^a \int_0^b [\hat{D}(s, u, t) - D(s, u, t)]dt\psi(s)ds \\ &\quad - \int_0^a \int_0^b [\hat{\mu}(s, t)\hat{\mu}(u, t) - \mu(s, t)\mu(u, t)]dt\psi(s)ds \\ &\equiv B_{n1} - B_{n2}. \end{aligned}$$

Similarly to equation (36) in Appendix A.3, we have

$$\begin{aligned} &[\hat{D}(s, u, t) - D(s, u, t)]\psi(s) \\ &= \left\{ \frac{\psi(s)}{f_2(s, u, t)}(\omega_{11}, \dots, \omega_{1, d+3}) + O_{a.s.}(\delta_{n2}(h_3, h_4, h_5) + h_3 + h_4 + h_5) \right\} \mathbf{R}_n^*(s, u, t). \end{aligned} \quad (27)$$

Note that

$$\begin{aligned} &\sup_{s, u \in [0, a], t \in [0, b]} \left[ \frac{-\psi(s)}{f_2(s, u, t)} \right] \int_0^a \int_0^b R_{npqr}^*(s, u, t) dt ds \\ &\leq \int_0^a \int_0^b \frac{\psi(s)}{f_2(s, u, t)} R_{npqr}^*(s, u, t) dt ds \\ &\leq \sup_{s, u \in [0, a], t \in [0, b]} \left[ \frac{\psi(s)}{f_2(s, u, t)} \right] \int_0^a \int_0^b R_{npqr}^*(s, u, t) dt ds, \end{aligned}$$

then  $B_{n1}$  has the same uniform convergence rate of  $\int_0^a \int_0^b \mathbf{R}_n^*(s, u, t) dt ds$ .

According to the expression (31) in Appendix A.3, of  $R_{npqr}^*(s, u, t)$ , it can be shown that

$$\begin{aligned}
& \int_0^a \int_0^b R_{npqr}^*(s, u, t) dt ds \\
&= \left\{ \frac{1}{n} \sum_{i=1}^n \frac{1}{M_i} \sum_{m=1}^{M_i} \frac{1}{L_{im}^*} \sum_{l \neq l'}^{L_{im}} \left[ \int_0^a K_{h_3, p}(S_{iml} - s) ds \int_0^b K_{h_5, r}(T_{im} - t) dt \right. \right. \\
&\quad \left. \left. K_{h_4, q}(S_{iml'} - u) [Y_{iml} Y_{iml'} - D(S_{iml}, S_{iml'}, T_{im})] \right] + O_{a.s.}(\gamma_{2d}(h_3, h_4, h_5)) \right\} \\
&= \left\{ \frac{\nu_p \nu_q}{n} \sum_{i=1}^n \frac{1}{M_i} \sum_{m=1}^{M_i} \frac{1}{L_{im}^*} \sum_{l \neq l'}^{L_{im}} K_{h_4, q}(S_{iml'} - u) [Y_{iml} Y_{iml'} - D(S_{iml}, S_{iml'}, T_{im})] \right. \\
&\quad \left. + O_{a.s.}(\gamma_{2d}(h_3, h_4, h_5)) \right\}
\end{aligned}$$

Thus by Lemma 6, we can obtain that uniformly for  $u \in [0, a]$ ,

$$\int_0^a \int_0^b R_{npqr}^*(s, u, t) dt ds = O_{a.s.}(\delta_{n2}(h_4, 1, 1) + \gamma_{2d}(h_3, h_4, h_5)).$$

which is also the rate of  $B_{n1}$ . Next, we write

$$\begin{aligned}
B_{n2} &= \int_0^a \int_0^b \{\hat{\mu}(s, t) \hat{\mu}(u, t) - \mu(s, t) \mu(u, t)\} dt \psi(s) ds \\
&\leq \int_0^a \int_0^b \hat{\mu}(s, t) \{\hat{\mu}(u, t) - \mu(u, t)\} dt \psi(s) ds + \int_0^a \int_0^b \{\hat{\mu}(s, t) - \mu(s, t)\} \mu(u, t) dt \psi(s) ds.
\end{aligned}$$

Similarly to the derivation to equation (36) in Appendix A.3, we have  $B_{n2} = O_{a.s.}(\delta_{n1}(h_1, 1) + \gamma_{1d}(h_1, h_2))$ . Thus, we can obtain that uniformly for  $u \in [0, a]$ ,

$$|(\Delta\psi)(u)| = O_{a.s.}(\delta_{n2}(h_4, 1, 1) + \gamma_{2d}(h_3, h_4, h_5) + \delta_{n1}(h_1, 1) + \gamma_{1d}(h_1, h_2)) \quad (28)$$

□
